# Supplementary material
Source: publisher figshare collection journal article supplement (https://gsajournals.figshare.com/ndownloader/files/27462713)
Supplement: Supplementary file 1 [file 27462713]

## Sheet: README
Covid data significant and non significant. Non-significant synthetic biome at each level of coverage on farr right tabs

## Sheet: Mock24vsCOV1-24_Sig
name	levine_statistic	levine_pval	t_statistic	t_pval	t_padj	t_padj_reject	blast_sseqid	blast_evalue	taxid	length	Calu3_COV2_12h_2	Calu3_COV2_04h_1	Calu3_COV2_24h_1	Calu3_COV2_24h_2	Calu3_COV2_12h_1	Calu3_COV2_04h_2	Calu3_MOCK_24h_1	Calu3_UNTR_04h_2	Calu3_MOCK_04h_1	Calu3_COV1_12h_1	Calu3_COV1_04h_2	Calu3_COV1_24h_2	Calu3_COV1_24h_1	Calu3_COV1_12h_2	Calu3_COV1_04h_1	Calu3_UNTR_04h_1	Calu3_MOCK_04h_2	Calu3_MOCK_24h_2
SARS coronavirus A022	1.77797e+29	5.62438e-30	39.2637	0.00064803	0.00356417	TRUE	94.964	3.79e-53	304858	139	0	0	0	0	0	0	0	0	0	0	0	0.942446	0.895632	0	0	0	0	0
SARS coronavirus BJ01	5.06805e+30	1.97315e-31	8.55281	0.0133963	0.02456	TRUE	978.86	2.07e-32	2284070	6560	490.234	5.81739	283.483	328.223	523.943	17.9493	1.06833	1.46279	1.1157	19129.2	440.23	39120.3	30930.2	22616.7	230.729	2.64992	0.77769	0.87911
SARS coronavirus BJ182-12	inf	0	10.5238	0.0089088	0.0195994	TRUE	99.882	0	511429	866	3.40382	0	12.4841	19.7277	6.15921	0.16265	0	0.0848929	0	2757.58	39.2372	5420.79	4480	3120.47	21.3713	0.126614	0.121379	0
SARS coronavirus HKU-39849	7.0175e+39	1.42501e-40	7.50113	0.0173123	0.0263891	TRUE	699.448	0	1598828	11843	37.1987	0.0169736	44.7128	72.4926	68.7449	2.22631	0.296605	0.27181	0.179636	8626.42	110.648	19766.7	15116.4	9120.14	60.3852	0.61538	0.28557	0.398941
SARS coronavirus Sin2677	7.89296e+30	1.26695e-31	6.69484	0.0215911	0.0263891	TRUE	99.396	0	235413	1599	0.261345	0	5.35578	6.91879	1.76868	0.152487	0.0386381	0.0368425	0	1032.08	11.836	2457.78	1818.98	1131.61	6.85881	0.0497342	0.0240195	0.0479138
SARS coronavirus SinP1	5.85543e+29	1.70782e-30	12.1997	0.00665201	0.0195994	TRUE	199.754	0	534780	5705	4.05946	0.0121717	21.3682	36.4744	10.9825	0.797354	0.218977	0.213256	0.147523	4212.56	77.4798	9187.69	7795.63	4756.8	43.5605	0.548823	0.231404	0.37675
SARS coronavirus Sin_WNV	6.23705e+30	1.60332e-31	6.82471	0.0208024	0.0263891	TRUE	1789.81	6.52e-114	4790664	11773	812.397	8.16884	462.734	450.745	793.708	27.7451	1.15757	1.54311	1.26496	34580	461.358	71093.4	52922.1	40903.9	240.398	3.64801	0.753795	0.948253
SARS coronavirus Urbani	6.36039e+39	1.57223e-40	10.6813	0.00865143	0.0195994	TRUE	3914.7	1.12e-23	9133200	13463	183.802	2.37421	174.028	218.346	236.819	9.28386	0.55337	0.812536	0.93491	24092.8	392.859	51717.6	42863	28026.1	212.238	1.88205	1.1144	0.948019
Severe acute respiratory syndrome coronavirus 2	7.98146e+24	1.2529e-25	46.2737	0.000466688	0.00356417	TRUE	77490.8	4.00001e-10	2103698220	678336	539624	3583.86	348251	268399	537197	24911.4	13.5357	223.592	33.5158	359.542	99.3496	554.349	571.042	1632.47	24.6711	14.3585	13.7602	29.9074

## Sheet: Mock24vsCOV1-24_All
name	levine_statistic	levine_pval	t_statistic	t_pval	t_padj	t_padj_reject	blast_sseqid	blast_evalue	taxid	length	Calu3_COV2_12h_2	Calu3_COV2_04h_1	Calu3_COV2_24h_1	Calu3_COV2_24h_2	Calu3_COV2_12h_1	Calu3_COV2_04h_2	Calu3_MOCK_24h_1	Calu3_UNTR_04h_2	Calu3_MOCK_04h_1	Calu3_COV1_12h_1	Calu3_COV1_04h_2	Calu3_COV1_24h_2	Calu3_COV1_24h_1	Calu3_COV1_12h_2	Calu3_COV1_04h_1	Calu3_UNTR_04h_1	Calu3_MOCK_04h_2	Calu3_MOCK_24h_2
BtRs-BetaCoV/HuB2013	inf	0	1	0.42265	0.42265	FALSE	97.006	6.11e-72	1503302	169	31.1982	0	11.4512	6.55274	18.3345	0.333986	0	0	0	0	0	0.621302	0	0	0	0	0	0
SARS coronavirus A022	1.77797e+29	5.62438e-30	39.2637	0.00064803	0.00356417	TRUE	94.964	3.79e-53	304858	139	0	0	0	0	0	0	0	0	0	0	0	0.942446	0.895632	0	0	0	0	0
SARS coronavirus BJ01	5.06805e+30	1.97315e-31	8.55281	0.0133963	0.02456	TRUE	978.86	2.07e-32	2284070	6560	490.234	5.81739	283.483	328.223	523.943	17.9493	1.06833	1.46279	1.1157	19129.2	440.23	39120.3	30930.2	22616.7	230.729	2.64992	0.77769	0.87911
SARS coronavirus BJ182-12	inf	0	10.5238	0.0089088	0.0195994	TRUE	99.882	0	511429	866	3.40382	0	12.4841	19.7277	6.15921	0.16265	0	0.0848929	0	2757.58	39.2372	5420.79	4480	3120.47	21.3713	0.126614	0.121379	0
SARS coronavirus HKU-39849	7.0175e+39	1.42501e-40	7.50113	0.0173123	0.0263891	TRUE	699.448	0	1598828	11843	37.1987	0.0169736	44.7128	72.4926	68.7449	2.22631	0.296605	0.27181	0.179636	8626.42	110.648	19766.7	15116.4	9120.14	60.3852	0.61538	0.28557	0.398941
SARS coronavirus Sin2677	7.89296e+30	1.26695e-31	6.69484	0.0215911	0.0263891	TRUE	99.396	0	235413	1599	0.261345	0	5.35578	6.91879	1.76868	0.152487	0.0386381	0.0368425	0	1032.08	11.836	2457.78	1818.98	1131.61	6.85881	0.0497342	0.0240195	0.0479138
SARS coronavirus SinP1	5.85543e+29	1.70782e-30	12.1997	0.00665201	0.0195994	TRUE	199.754	0	534780	5705	4.05946	0.0121717	21.3682	36.4744	10.9825	0.797354	0.218977	0.213256	0.147523	4212.56	77.4798	9187.69	7795.63	4756.8	43.5605	0.548823	0.231404	0.37675
SARS coronavirus Sin_WNV	6.23705e+30	1.60332e-31	6.82471	0.0208024	0.0263891	TRUE	1789.81	6.52e-114	4790664	11773	812.397	8.16884	462.734	450.745	793.708	27.7451	1.15757	1.54311	1.26496	34580	461.358	71093.4	52922.1	40903.9	240.398	3.64801	0.753795	0.948253
SARS coronavirus Taiwan TC3	inf	0	1	0.42265	0.42265	FALSE	96.479	3.87e-58	239758	142	0	0	0	0	0	0	0	0	0	0	0	1.8169	0	0	0	0	0	0
SARS coronavirus Urbani	6.36039e+39	1.57223e-40	10.6813	0.00865143	0.0195994	TRUE	3914.7	1.12e-23	9133200	13463	183.802	2.37421	174.028	218.346	236.819	9.28386	0.55337	0.812536	0.93491	24092.8	392.859	51717.6	42863	28026.1	212.238	1.88205	1.1144	0.948019
Severe acute respiratory syndrome coronavirus 2	7.98146e+24	1.2529e-25	46.2737	0.000466688	0.00356417	TRUE	77490.8	4.00001e-10	2103698220	678336	539624	3583.86	348251	268399	537197	24911.4	13.5357	223.592	33.5158	359.542	99.3496	554.349	571.042	1632.47	24.6711	14.3585	13.7602	29.9074
Bat SARS coronavirus HKU3-12							89.503	3.98e-54	741999	177	22.1912	0	10.168	9.86392	14.3555	0.211157	0	0	0	0	0	0	0	0	0	0	0	0
Human gammaherpesvirus 4							98.175	0	10376	2064	0	0	0	0.0577324	0.196006	0	0	0.0176915	0	0	0.0517021	0	0	0	0	0.0182431	0	0
Human immunodeficiency virus 1							100	3.69e-43	11676	135	0	0	0	0	0	0.15255	0	0	0	0	0	0	0	0	0	0	0	0

## Sheet: Mock24vsCOV2-24_Sig
name	levine_statistic	levine_pval	t_statistic	t_pval	t_padj	t_padj_reject	blast_sseqid	blast_evalue	taxid	length	Calu3_COV2_12h_2	Calu3_COV2_04h_1	Calu3_COV2_24h_1	Calu3_COV2_24h_2	Calu3_COV2_12h_1	Calu3_COV2_04h_2	Calu3_MOCK_24h_1	Calu3_UNTR_04h_2	Calu3_MOCK_04h_1	Calu3_COV1_12h_1	Calu3_COV1_04h_2	Calu3_COV1_24h_2	Calu3_COV1_24h_1	Calu3_COV1_12h_2	Calu3_COV1_04h_1	Calu3_UNTR_04h_1	Calu3_MOCK_04h_2	Calu3_MOCK_24h_2
Bat SARS coronavirus HKU3-12	2.93029e+28	3.41263e-29	65.8774	0.000230344	0.00126689	TRUE	89.503	3.98e-54	741999	177	22.1912	0	10.168	9.86392	14.3555	0.211157	0	0	0	0	0	0	0	0	0	0	0	0
SARS coronavirus BJ01	1.61019e+35	6.21045e-36	13.629	0.00534049	0.0195818	TRUE	978.86	2.07e-32	2284070	6560	490.234	5.81739	283.483	328.223	523.943	17.9493	1.06833	1.46279	1.1157	19129.2	440.23	39120.3	30930.2	22616.7	230.729	2.64992	0.77769	0.87911
SARS coronavirus Sin2677	3.06005e+30	3.26792e-31	7.79763	0.0160516	0.0299941	TRUE	99.396	0	235413	1599	0.261345	0	5.35578	6.91879	1.76868	0.152487	0.0386381	0.0368425	0	1032.08	11.836	2457.78	1818.98	1131.61	6.85881	0.0497342	0.0240195	0.0479138
SARS coronavirus Sin_WNV	4.29494e+28	2.32832e-29	76.0014	0.000173079	0.00126689	TRUE	1789.81	6.52e-114	4790664	11773	812.397	8.16884	462.734	450.745	793.708	27.7451	1.15757	1.54311	1.26496	34580	461.358	71093.4	52922.1	40903.9	240.398	3.64801	0.753795	0.948253
SARS coronavirus Urbani	1.56525e+35	6.38877e-36	8.81925	0.0126142	0.0299941	TRUE	3914.7	1.12e-23	9133200	13463	183.802	2.37421	174.028	218.346	236.819	9.28386	0.55337	0.812536	0.93491	24092.8	392.859	51717.6	42863	28026.1	212.238	1.88205	1.1144	0.948019
Severe acute respiratory syndrome coronavirus 2	1.88119e+30	5.31578e-31	7.72187	0.0163604	0.0299941	TRUE	77490.8	4.00001e-10	2103698220	678336	539624	3583.86	348251	268399	537197	24911.4	13.5357	223.592	33.5158	359.542	99.3496	554.349	571.042	1632.47	24.6711	14.3585	13.7602	29.9074

## Sheet: Mock24vsCOV2-24_All
name	levine_statistic	levine_pval	t_statistic	t_pval	t_padj	t_padj_reject	blast_sseqid	blast_evalue	taxid	length	Calu3_COV2_12h_2	Calu3_COV2_04h_1	Calu3_COV2_24h_1	Calu3_COV2_24h_2	Calu3_COV2_12h_1	Calu3_COV2_04h_2	Calu3_MOCK_24h_1	Calu3_UNTR_04h_2	Calu3_MOCK_04h_1	Calu3_COV1_12h_1	Calu3_COV1_04h_2	Calu3_COV1_24h_2	Calu3_COV1_24h_1	Calu3_COV1_12h_2	Calu3_COV1_04h_1	Calu3_UNTR_04h_1	Calu3_MOCK_04h_2	Calu3_MOCK_24h_2
Bat SARS coronavirus HKU3-12	2.93029e+28	3.41263e-29	65.8774	0.000230344	0.00126689	TRUE	89.503	3.98e-54	741999	177	22.1912	0	10.168	9.86392	14.3555	0.211157	0	0	0	0	0	0	0	0	0	0	0	0
BtRs-BetaCoV/HuB2013	3.04173e+31	3.2876e-32	3.67542	0.0667046	0.0733751	FALSE	97.006	6.11e-72	1503302	169	31.1982	0	11.4512	6.55274	18.3345	0.333986	0	0	0	0	0	0.621302	0	0	0	0	0	0
Human gammaherpesvirus 4	inf	0	1	0.42265	0.42265	FALSE	98.175	0	10376	2064	0	0	0	0.0577324	0.196006	0	0	0.0176915	0	0	0.0517021	0	0	0	0	0.0182431	0	0
SARS coronavirus BJ01	1.61019e+35	6.21045e-36	13.629	0.00534049	0.0195818	TRUE	978.86	2.07e-32	2284070	6560	490.234	5.81739	283.483	328.223	523.943	17.9493	1.06833	1.46279	1.1157	19129.2	440.23	39120.3	30930.2	22616.7	230.729	2.64992	0.77769	0.87911
SARS coronavirus BJ182-12	4.15704e+30	2.40556e-31	4.44696	0.0470292	0.0720786	FALSE	99.882	0	511429	866	3.40382	0	12.4841	19.7277	6.15921	0.16265	0	0.0848929	0	2757.58	39.2372	5420.79	4480	3120.47	21.3713	0.126614	0.121379	0
SARS coronavirus HKU-39849	1.51721e+31	6.59106e-32	4.19402	0.0524208	0.0720786	FALSE	699.448	0	1598828	11843	37.1987	0.0169736	44.7128	72.4926	68.7449	2.22631	0.296605	0.27181	0.179636	8626.42	110.648	19766.7	15116.4	9120.14	60.3852	0.61538	0.28557	0.398941
SARS coronavirus Sin2677	3.06005e+30	3.26792e-31	7.79763	0.0160516	0.0299941	TRUE	99.396	0	235413	1599	0.261345	0	5.35578	6.91879	1.76868	0.152487	0.0386381	0.0368425	0	1032.08	11.836	2457.78	1818.98	1131.61	6.85881	0.0497342	0.0240195	0.0479138
SARS coronavirus SinP1	2.90064e+35	3.44752e-36	3.78941	0.063118	0.0733751	FALSE	199.754	0	534780	5705	4.05946	0.0121717	21.3682	36.4744	10.9825	0.797354	0.218977	0.213256	0.147523	4212.56	77.4798	9187.69	7795.63	4756.8	43.5605	0.548823	0.231404	0.37675
SARS coronavirus Sin_WNV	4.29494e+28	2.32832e-29	76.0014	0.000173079	0.00126689	TRUE	1789.81	6.52e-114	4790664	11773	812.397	8.16884	462.734	450.745	793.708	27.7451	1.15757	1.54311	1.26496	34580	461.358	71093.4	52922.1	40903.9	240.398	3.64801	0.753795	0.948253
SARS coronavirus Urbani	1.56525e+35	6.38877e-36	8.81925	0.0126142	0.0299941	TRUE	3914.7	1.12e-23	9133200	13463	183.802	2.37421	174.028	218.346	236.819	9.28386	0.55337	0.812536	0.93491	24092.8	392.859	51717.6	42863	28026.1	212.238	1.88205	1.1144	0.948019
Severe acute respiratory syndrome coronavirus 2	1.88119e+30	5.31578e-31	7.72187	0.0163604	0.0299941	TRUE	77490.8	4.00001e-10	2103698220	678336	539624	3583.86	348251	268399	537197	24911.4	13.5357	223.592	33.5158	359.542	99.3496	554.349	571.042	1632.47	24.6711	14.3585	13.7602	29.9074
Human immunodeficiency virus 1							100	3.69e-43	11676	135	0	0	0	0	0	0.15255	0	0	0	0	0	0	0	0	0	0	0	0
SARS coronavirus A022							94.964	3.79e-53	304858	139	0	0	0	0	0	0	0	0	0	0	0	0.942446	0.895632	0	0	0	0	0
SARS coronavirus Taiwan TC3							96.479	3.87e-58	239758	142	0	0	0	0	0	0	0	0	0	0	0	1.8169	0	0	0	0	0	0

## Sheet: COV1-24vsCOV2-24_Sig
name	levine_statistic	levine_pval	t_statistic	t_pval	t_padj	t_padj_reject	blast_sseqid	blast_evalue	taxid	length	Calu3_COV2_12h_2	Calu3_COV2_04h_1	Calu3_COV2_24h_1	Calu3_COV2_24h_2	Calu3_COV2_12h_1	Calu3_COV2_04h_2	Calu3_MOCK_24h_1	Calu3_UNTR_04h_2	Calu3_MOCK_04h_1	Calu3_COV1_12h_1	Calu3_COV1_04h_2	Calu3_COV1_24h_2	Calu3_COV1_24h_1	Calu3_COV1_12h_2	Calu3_COV1_04h_1	Calu3_UNTR_04h_1	Calu3_MOCK_04h_2	Calu3_MOCK_24h_2
Bat SARS coronavirus HKU3-12	2.93029e+28	3.41263e-29	65.8774	0.000230344	0.00299447	TRUE	89.503	3.98e-54	741999	177	22.1912	0	10.168	9.86392	14.3555	0.211157	0	0	0	0	0	0	0	0	0	0	0	0
SARS coronavirus A022	1.77797e+29	5.62438e-30	-39.2637	0.00064803	0.0042122	TRUE	94.964	3.79e-53	304858	139	0	0	0	0	0	0	0	0	0	0	0	0.942446	0.895632	0	0	0	0	0
SARS coronavirus BJ01	5.01306e+30	1.99479e-31	-8.47823	0.0136282	0.0282241	TRUE	978.86	2.07e-32	2284070	6560	490.234	5.81739	283.483	328.223	523.943	17.9493	1.06833	1.46279	1.1157	19129.2	440.23	39120.3	30930.2	22616.7	230.729	2.64992	0.77769	0.87911
SARS coronavirus BJ182-12	6.90493e+34	1.44824e-35	-10.4893	0.0089668	0.0233137	TRUE	99.882	0	511429	866	3.40382	0	12.4841	19.7277	6.15921	0.16265	0	0.0848929	0	2757.58	39.2372	5420.79	4480	3120.47	21.3713	0.126614	0.121379	0
SARS coronavirus HKU-39849	4.23231e+35	2.36278e-36	-7.47594	0.0174261	0.0282241	TRUE	699.448	0	1598828	11843	37.1987	0.0169736	44.7128	72.4926	68.7449	2.22631	0.296605	0.27181	0.179636	8626.42	110.648	19766.7	15116.4	9120.14	60.3852	0.61538	0.28557	0.398941
SARS coronavirus Sin2677	7.85449e+30	1.27316e-31	-6.67574	0.0217108	0.0282241	TRUE	99.396	0	235413	1599	0.261345	0	5.35578	6.91879	1.76868	0.152487	0.0386381	0.0368425	0	1032.08	11.836	2457.78	1818.98	1131.61	6.85881	0.0497342	0.0240195	0.0479138
SARS coronavirus SinP1	5.73034e+29	1.7451e-30	-12.1578	0.00669741	0.0233137	TRUE	199.754	0	534780	5705	4.05946	0.0121717	21.3682	36.4744	10.9825	0.797354	0.218977	0.213256	0.147523	4212.56	77.4798	9187.69	7795.63	4756.8	43.5605	0.548823	0.231404	0.37675
SARS coronavirus Sin_WNV	6.22858e+30	1.6055e-31	-6.77455	0.0211018	0.0282241	TRUE	1789.81	6.52e-114	4790664	11773	812.397	8.16884	462.734	450.745	793.708	27.7451	1.15757	1.54311	1.26496	34580	461.358	71093.4	52922.1	40903.9	240.398	3.64801	0.753795	0.948253
SARS coronavirus Urbani	inf	0	-10.637	0.00872266	0.0233137	TRUE	3914.7	1.12e-23	9133200	13463	183.802	2.37421	174.028	218.346	236.819	9.28386	0.55337	0.812536	0.93491	24092.8	392.859	51717.6	42863	28026.1	212.238	1.88205	1.1144	0.948019
Severe acute respiratory syndrome coronavirus 2	1.88117e+30	5.31585e-31	7.70833	0.0164165	0.0282241	TRUE	77490.8	4.00001e-10	2103698220	678336	539624	3583.86	348251	268399	537197	24911.4	13.5357	223.592	33.5158	359.542	99.3496	554.349	571.042	1632.47	24.6711	14.3585	13.7602	29.9074

## Sheet: COV1-24vsCOV2-24_All
name	levine_statistic	levine_pval	t_statistic	t_pval	t_padj	t_padj_reject	blast_sseqid	blast_evalue	taxid	length	Calu3_COV2_12h_2	Calu3_COV2_04h_1	Calu3_COV2_24h_1	Calu3_COV2_24h_2	Calu3_COV2_12h_1	Calu3_COV2_04h_2	Calu3_MOCK_24h_1	Calu3_UNTR_04h_2	Calu3_MOCK_04h_1	Calu3_COV1_12h_1	Calu3_COV1_04h_2	Calu3_COV1_24h_2	Calu3_COV1_24h_1	Calu3_COV1_12h_2	Calu3_COV1_04h_1	Calu3_UNTR_04h_1	Calu3_MOCK_04h_2	Calu3_MOCK_24h_2
Bat SARS coronavirus HKU3-12	2.93029e+28	3.41263e-29	65.8774	0.000230344	0.00299447	TRUE	89.503	3.98e-54	741999	177	22.1912	0	10.168	9.86392	14.3555	0.211157	0	0	0	0	0	0	0	0	0	0	0	0
BtRs-BetaCoV/HuB2013	2.31906e+31	4.31208e-32	3.52038	0.0720752	0.0851798	FALSE	97.006	6.11e-72	1503302	169	31.1982	0	11.4512	6.55274	18.3345	0.333986	0	0	0	0	0	0.621302	0	0	0	0	0	0
Human gammaherpesvirus 4	inf	0	1	0.42265	0.42265	FALSE	98.175	0	10376	2064	0	0	0	0.0577324	0.196006	0	0	0.0176915	0	0	0.0517021	0	0	0	0	0.0182431	0	0
SARS coronavirus A022	1.77797e+29	5.62438e-30	-39.2637	0.00064803	0.0042122	TRUE	94.964	3.79e-53	304858	139	0	0	0	0	0	0	0	0	0	0	0	0.942446	0.895632	0	0	0	0	0
SARS coronavirus BJ01	5.01306e+30	1.99479e-31	-8.47823	0.0136282	0.0282241	TRUE	978.86	2.07e-32	2284070	6560	490.234	5.81739	283.483	328.223	523.943	17.9493	1.06833	1.46279	1.1157	19129.2	440.23	39120.3	30930.2	22616.7	230.729	2.64992	0.77769	0.87911
SARS coronavirus BJ182-12	6.90493e+34	1.44824e-35	-10.4893	0.0089668	0.0233137	TRUE	99.882	0	511429	866	3.40382	0	12.4841	19.7277	6.15921	0.16265	0	0.0848929	0	2757.58	39.2372	5420.79	4480	3120.47	21.3713	0.126614	0.121379	0
SARS coronavirus HKU-39849	4.23231e+35	2.36278e-36	-7.47594	0.0174261	0.0282241	TRUE	699.448	0	1598828	11843	37.1987	0.0169736	44.7128	72.4926	68.7449	2.22631	0.296605	0.27181	0.179636	8626.42	110.648	19766.7	15116.4	9120.14	60.3852	0.61538	0.28557	0.398941
SARS coronavirus Sin2677	7.85449e+30	1.27316e-31	-6.67574	0.0217108	0.0282241	TRUE	99.396	0	235413	1599	0.261345	0	5.35578	6.91879	1.76868	0.152487	0.0386381	0.0368425	0	1032.08	11.836	2457.78	1818.98	1131.61	6.85881	0.0497342	0.0240195	0.0479138
SARS coronavirus SinP1	5.73034e+29	1.7451e-30	-12.1578	0.00669741	0.0233137	TRUE	199.754	0	534780	5705	4.05946	0.0121717	21.3682	36.4744	10.9825	0.797354	0.218977	0.213256	0.147523	4212.56	77.4798	9187.69	7795.63	4756.8	43.5605	0.548823	0.231404	0.37675
SARS coronavirus Sin_WNV	6.22858e+30	1.6055e-31	-6.77455	0.0211018	0.0282241	TRUE	1789.81	6.52e-114	4790664	11773	812.397	8.16884	462.734	450.745	793.708	27.7451	1.15757	1.54311	1.26496	34580	461.358	71093.4	52922.1	40903.9	240.398	3.64801	0.753795	0.948253
SARS coronavirus Taiwan TC3	inf	0	-1	0.42265	0.42265	FALSE	96.479	3.87e-58	239758	142	0	0	0	0	0	0	0	0	0	0	0	1.8169	0	0	0	0	0	0
SARS coronavirus Urbani	inf	0	-10.637	0.00872266	0.0233137	TRUE	3914.7	1.12e-23	9133200	13463	183.802	2.37421	174.028	218.346	236.819	9.28386	0.55337	0.812536	0.93491	24092.8	392.859	51717.6	42863	28026.1	212.238	1.88205	1.1144	0.948019
Severe acute respiratory syndrome coronavirus 2	1.88117e+30	5.31585e-31	7.70833	0.0164165	0.0282241	TRUE	77490.8	4.00001e-10	2103698220	678336	539624	3583.86	348251	268399	537197	24911.4	13.5357	223.592	33.5158	359.542	99.3496	554.349	571.042	1632.47	24.6711	14.3585	13.7602	29.9074
Human immunodeficiency virus 1							100	3.69e-43	11676	135	0	0	0	0	0	0.15255	0	0	0	0	0	0	0	0	0	0	0	0

## Sheet: Mock4vsCOV1-12_Sig
name	levine_statistic	levine_pval	t_statistic	t_pval	t_padj	t_padj_reject	blast_sseqid	blast_evalue	taxid	length	Calu3_COV2_12h_2	Calu3_COV2_04h_1	Calu3_COV2_24h_1	Calu3_COV2_24h_2	Calu3_COV2_12h_1	Calu3_COV2_04h_2	Calu3_MOCK_24h_1	Calu3_UNTR_04h_2	Calu3_MOCK_04h_1	Calu3_COV1_12h_1	Calu3_COV1_04h_2	Calu3_COV1_24h_2	Calu3_COV1_24h_1	Calu3_COV1_12h_2	Calu3_COV1_04h_1	Calu3_UNTR_04h_1	Calu3_MOCK_04h_2	Calu3_MOCK_24h_2
SARS coronavirus BJ01	9.18791e+29	1.08839e-30	11.9697	0.0069074	0.00793841	TRUE	978.86	2.07e-32	2284070	6560	490.234	5.81739	283.483	328.223	523.943	17.9493	1.06833	1.46279	1.1157	19129.2	440.23	39120.3	30930.2	22616.7	230.729	2.64992	0.77769	0.87911
SARS coronavirus BJ182-12	6.36386e+29	1.57137e-30	16.1975	0.0037899	0.0075798	TRUE	99.882	0	511429	866	3.40382	0	12.4841	19.7277	6.15921	0.16265	0	0.0848929	0	2757.58	39.2372	5420.79	4480	3120.47	21.3713	0.126614	0.121379	0
SARS coronavirus HKU-39849	3.16286e+38	3.1617e-39	35.9434	0.000773139	0.00618511	TRUE	699.448	0	1598828	11843	37.1987	0.0169736	44.7128	72.4926	68.7449	2.22631	0.296605	0.27181	0.179636	8626.42	110.648	19766.7	15116.4	9120.14	60.3852	0.61538	0.28557	0.398941
SARS coronavirus Sin2677	inf	0	21.7372	0.00210969	0.0075798	TRUE	99.396	0	235413	1599	0.261345	0	5.35578	6.91879	1.76868	0.152487	0.0386381	0.0368425	0	1032.08	11.836	2457.78	1818.98	1131.61	6.85881	0.0497342	0.0240195	0.0479138
SARS coronavirus SinP1	3.57972e+29	2.79352e-30	16.4798	0.0036619	0.0075798	TRUE	199.754	0	534780	5705	4.05946	0.0121717	21.3682	36.4744	10.9825	0.797354	0.218977	0.213256	0.147523	4212.56	77.4798	9187.69	7795.63	4756.8	43.5605	0.548823	0.231404	0.37675
SARS coronavirus Sin_WNV	7.55301e+29	1.32398e-30	11.936	0.00694611	0.00793841	TRUE	1789.81	6.52e-114	4790664	11773	812.397	8.16884	462.734	450.745	793.708	27.7451	1.15757	1.54311	1.26496	34580	461.358	71093.4	52922.1	40903.9	240.398	3.64801	0.753795	0.948253
SARS coronavirus Urbani	1.16886e+30	8.55536e-31	13.2501	0.00564772	0.00793841	TRUE	3914.7	1.12e-23	9133200	13463	183.802	2.37421	174.028	218.346	236.819	9.28386	0.55337	0.812536	0.93491	24092.8	392.859	51717.6	42863	28026.1	212.238	1.88205	1.1144	0.948019

## Sheet: Mock4vsCOV2-12_Sig
name	levine_statistic	levine_pval	t_statistic	t_pval	t_padj	t_padj_reject	blast_sseqid	blast_evalue	taxid	length	Calu3_COV2_12h_2	Calu3_COV2_04h_1	Calu3_COV2_24h_1	Calu3_COV2_24h_2	Calu3_COV2_12h_1	Calu3_COV2_04h_2	Calu3_MOCK_24h_1	Calu3_UNTR_04h_2	Calu3_MOCK_04h_1	Calu3_COV1_12h_1	Calu3_COV1_04h_2	Calu3_COV1_24h_2	Calu3_COV1_24h_1	Calu3_COV1_12h_2	Calu3_COV1_04h_1	Calu3_UNTR_04h_1	Calu3_MOCK_04h_2	Calu3_MOCK_24h_2
SARS coronavirus BJ01	9.03526e+34	1.10677e-35	30.0278	0.00110722	0.00405979	TRUE	978.86	2.07e-32	2284070	6560	490.234	5.81739	283.483	328.223	523.943	17.9493	1.06833	1.46279	1.1157	19129.2	440.23	39120.3	30930.2	22616.7	230.729	2.64992	0.77769	0.87911
SARS coronavirus Sin_WNV	2.55667e+28	3.91134e-29	85.7974	0.00013582	0.000747009	TRUE	1789.81	6.52e-114	4790664	11773	812.397	8.16884	462.734	450.745	793.708	27.7451	1.15757	1.54311	1.26496	34580	461.358	71093.4	52922.1	40903.9	240.398	3.64801	0.753795	0.948253
SARS coronavirus Urbani	2.26491e+35	4.41518e-36	7.89512	0.0156669	0.0430839	TRUE	3914.7	1.12e-23	9133200	13463	183.802	2.37421	174.028	218.346	236.819	9.28386	0.55337	0.812536	0.93491	24092.8	392.859	51717.6	42863	28026.1	212.238	1.88205	1.1144	0.948019
Severe acute respiratory syndrome coronavirus 2	inf	0	443.65	5.0806e-06	5.58866e-05	TRUE	77490.8	4.00001e-10	2103698220	678336	539624	3583.86	348251	268399	537197	24911.4	13.5357	223.592	33.5158	359.542	99.3496	554.349	571.042	1632.47	24.6711	14.3585	13.7602	29.9074

## Sheet: COV1-12vsCOV2-12_Sig
name	levine_statistic	levine_pval	t_statistic	t_pval	t_padj	t_padj_reject	blast_sseqid	blast_evalue	taxid	length	Calu3_COV2_12h_2	Calu3_COV2_04h_1	Calu3_COV2_24h_1	Calu3_COV2_24h_2	Calu3_COV2_12h_1	Calu3_COV2_04h_2	Calu3_MOCK_24h_1	Calu3_UNTR_04h_2	Calu3_MOCK_04h_1	Calu3_COV1_12h_1	Calu3_COV1_04h_2	Calu3_COV1_24h_2	Calu3_COV1_24h_1	Calu3_COV1_12h_2	Calu3_COV1_04h_1	Calu3_UNTR_04h_1	Calu3_MOCK_04h_2	Calu3_MOCK_24h_2
SARS coronavirus BJ01	9.0129e+29	1.10952e-30	-11.6789	0.0072519	0.00997136	TRUE	978.86	2.07e-32	2284070	6560	490.234	5.81739	283.483	328.223	523.943	17.9493	1.06833	1.46279	1.1157	19129.2	440.23	39120.3	30930.2	22616.7	230.729	2.64992	0.77769	0.87911
SARS coronavirus BJ182-12	6.27178e+29	1.59444e-30	-16.1711	0.00380225	0.00836495	TRUE	99.882	0	511429	866	3.40382	0	12.4841	19.7277	6.15921	0.16265	0	0.0848929	0	2757.58	39.2372	5420.79	4480	3120.47	21.3713	0.126614	0.121379	0
SARS coronavirus HKU-39849	4.23093e+33	2.36355e-34	-35.6571	0.000785591	0.00432075	TRUE	699.448	0	1598828	11843	37.1987	0.0169736	44.7128	72.4926	68.7449	2.22631	0.296605	0.27181	0.179636	8626.42	110.648	19766.7	15116.4	9120.14	60.3852	0.61538	0.28557	0.398941
SARS coronavirus Sin2677	inf	0	-21.7145	0.00211407	0.0077516	TRUE	99.396	0	235413	1599	0.261345	0	5.35578	6.91879	1.76868	0.152487	0.0386381	0.0368425	0	1032.08	11.836	2457.78	1818.98	1131.61	6.85881	0.0497342	0.0240195	0.0479138
SARS coronavirus SinP1	3.4903e+29	2.86508e-30	-16.4515	0.00367443	0.00836495	TRUE	199.754	0	534780	5705	4.05946	0.0121717	21.3682	36.4744	10.9825	0.797354	0.218977	0.213256	0.147523	4212.56	77.4798	9187.69	7795.63	4756.8	43.5605	0.548823	0.231404	0.37675
SARS coronavirus Sin_WNV	7.50781e+29	1.33195e-30	-11.6823	0.00724777	0.00997136	TRUE	1789.81	6.52e-114	4790664	11773	812.397	8.16884	462.734	450.745	793.708	27.7451	1.15757	1.54311	1.26496	34580	461.358	71093.4	52922.1	40903.9	240.398	3.64801	0.753795	0.948253
SARS coronavirus Urbani	1.13766e+30	8.78994e-31	-13.1424	0.00573979	0.00997136	TRUE	3914.7	1.12e-23	9133200	13463	183.802	2.37421	174.028	218.346	236.819	9.28386	0.55337	0.812536	0.93491	24092.8	392.859	51717.6	42863	28026.1	212.238	1.88205	1.1144	0.948019
Severe acute respiratory syndrome coronavirus 2	5.15245e+31	1.94083e-32	392.194	6.50122e-06	7.15134e-05	TRUE	77490.8	4.00001e-10	2103698220	678336	539624	3583.86	348251	268399	537197	24911.4	13.5357	223.592	33.5158	359.542	99.3496	554.349	571.042	1632.47	24.6711	14.3585	13.7602	29.9074

[truncated: 7 more sheets: Mock4vsCOV1-4_All, Mock4vsCOV2-4_All, OLD_database_Mock24vsCov2_sig, Synthetic_1000x_coverage, Synthetic_100x_coverage, Synthetic_10x_coverage, Synthetic_1x_coverage]
